# Supplementary material for: Coordination properties of N,N′-bis(5-methylsalicylidene)-2-hydroxy-1,3-propanediamine with d- and f-electron ions: crystal structure, stability in solution, spectroscopic and spectroelectrochemical studies
Source: Royal Society of Chemistry journal article supplement (doi:10.1039/c8ra03565b), 2018-01-01
Supplement: c8ra03565b1.pdf [file c8ra03565b1.pdf]

## Coordination properties of *N,N'*-bis(5-methylsalicylidene)-2-hydroxy-1,3-propanediamine with *d*- and *f*-electron ions: crystal structure, stability in the solution, spectroscopic and spectroelectrochemical studies

Malgorzata T. Kaczmarek\*, Monika Skrobanska, Michal Zabiszak, Monika Walesa-Chorab, Maciej Kubicki, Renata Jastrzab

### Supplementary information

Crystallographic data for the structural analysis has been deposited with the Cambridge Crystallographic Data Centre, Nos. CCDC – 1569983 (H<sub>3</sub>L **A**), CCDC-1569984 (H<sub>3</sub>L **B**), CCDC - 1569985 (**1**), and CCDC – 1569986 (**2**). Copies of this information may be obtained free of charge from: The Director, CCDC, 12 Union Road, Cambridge, CB2 1EZ, UK. Fax: +44(1223)336-033, e-mail:deposit@ccdc.cam.ac.uk, or www: www.ccdc.cam.ac.uk.

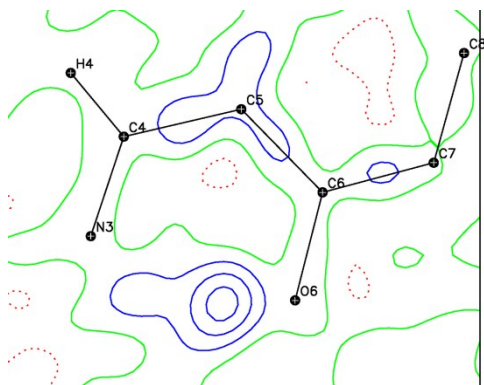

**Fig. S1** The difference Fourier map of H<sub>3</sub>L.

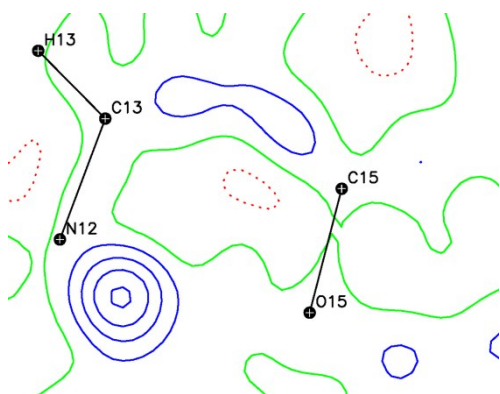

**Fig. S2** The difference Fourier map of H<sub>3</sub>L.

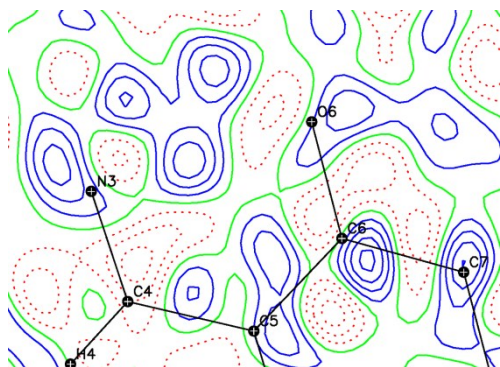

**Fig. S3** The difference Fourier map of H<sub>3</sub>L.

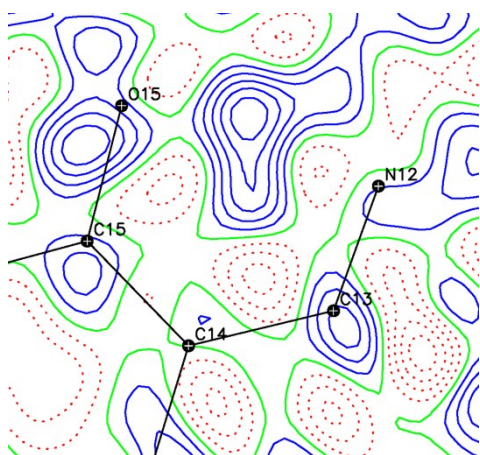

**Fig. S4** The difference Fourier map of H<sub>3</sub>L.

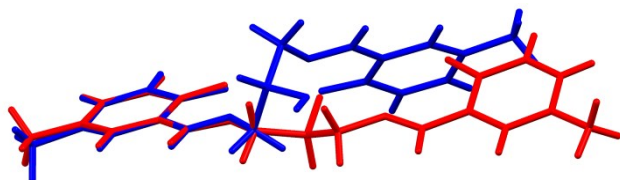

**Fig. S5** A comparison of conformations of H<sub>3</sub>L molecules from complexes (1) and (2).

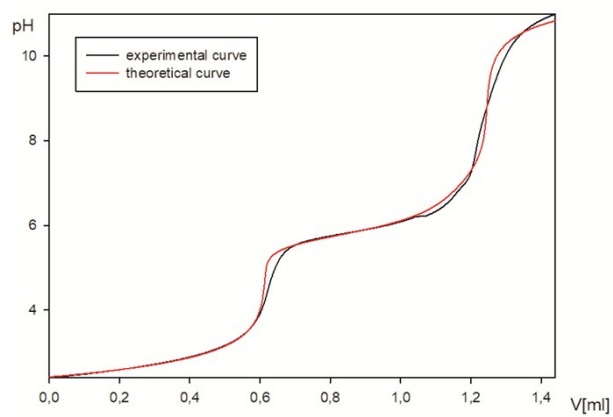

**Fig. S6** A comparison of experimental and theoretical curves of selected Cu<sup>2+</sup>/H<sub>3</sub>L system (1:1).

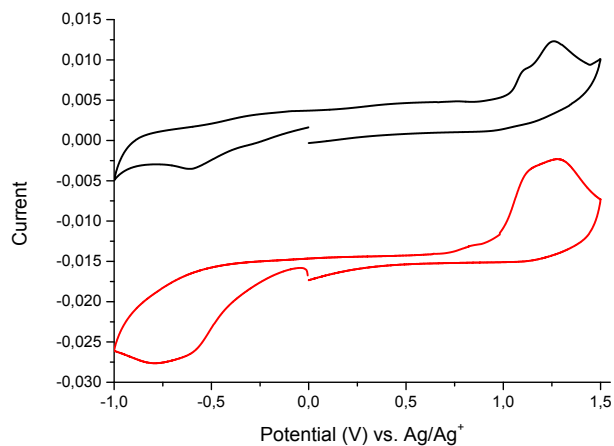

**Fig. S7** The cyclic voltammogram of complexes (2) (from synthesis with Dy) (black) and [CuHL] (from synthesis with Tb) (red) measured in anhydrous and deaerated acetonitrile with 0.1 M TBAPF<sub>6</sub> as a supporting electrolyte at a scan rate 100 mV/s scanned in the negative direction.

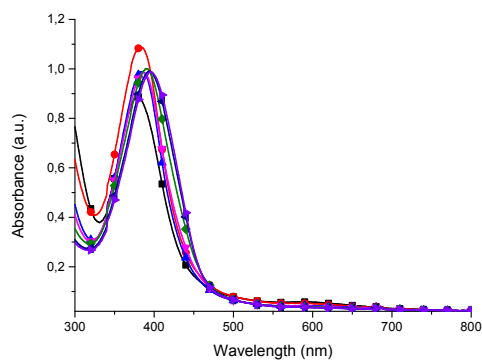

**Fig. S8** Spectroelectrochemistry of complex (2) (from synthesis with Dy) in dehydrated and deaerated acetonitrile with 0.1 M TBAPF<sub>6</sub> as a supporting electrolyte by applying 0 (■), -100 (●), -200 (▲), -300 (▼), -400 (◆), -500 (◄), and -600 mV (►) potential versus Ag/AgCl gel reference electrode held for 30 s per potential.

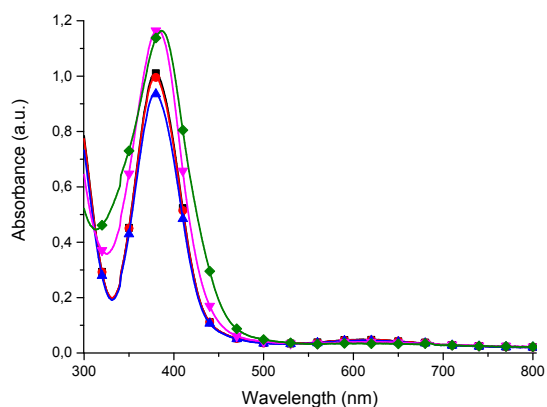

**Fig. S9** Spectroelectrochemistry of complex (2) (from synthesis with Tb) in dehydrated and deaerated acetonitrile with 0.1 M TBAPF<sub>6</sub> as a supporting electrolyte by applying 0 (■), -300 (●), -400 (▲), -500 (▼), and -600 mV (◆) potential versus Ag/AgCl gel reference electrode held for 30 s per potential.
